# Supplementary material for: Cwc23 is a component of the NTR complex and functions to stabilize Ntr1 and facilitate disassembly of spliceosome intermediates
Source: PubMed Central journal article supplement — Nucleic Acids Res. 2018 Jan 30;46(7):3764–73. doi: 10.1093/nar/gky052 (PMC6044358; doi:10.1093/nar/gky052), 2018-01-30
Supplement: gky052_supplemental_files.pdf [file gky052_supplemental_files.pdf]

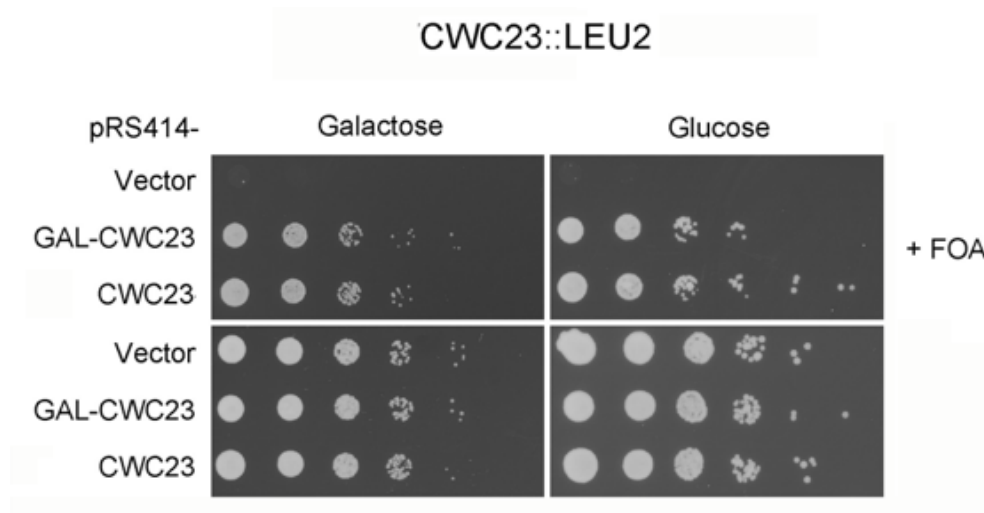

**Figure S1. CWC23 is essential for cellular growth but could not be repressed under the control of *GALI*-promoter.** Yeast cells, carrying null allele of *CWC23* (*CWC23::LEU2*), plasmid pRS416-*CWC23*, and additional pRS414 plasmid alone (Vector), or containing *CWC23* under the control of *GALI*-promoter (*GAL-CWC23*) or *CWC23* under the control of authentic promoter (*CWC23*), were spotted on galactose- or glucose-supplemented plates with (upper panels) or without (lower panels) FOA. FOA, 5-flouroorotic acid.
